# Supplementary material for: Difficult-to-Treat Rejections in Kidney Transplant Recipients: Our Experience with Everolimus-Based Quadruple Maintenance Therapy
Source: MDPI journal article supplement (doi:10.3390/jcm12206667), 2023-10-21
Supplement: s1 [file s1]

## Supplementary Material

Figure S1

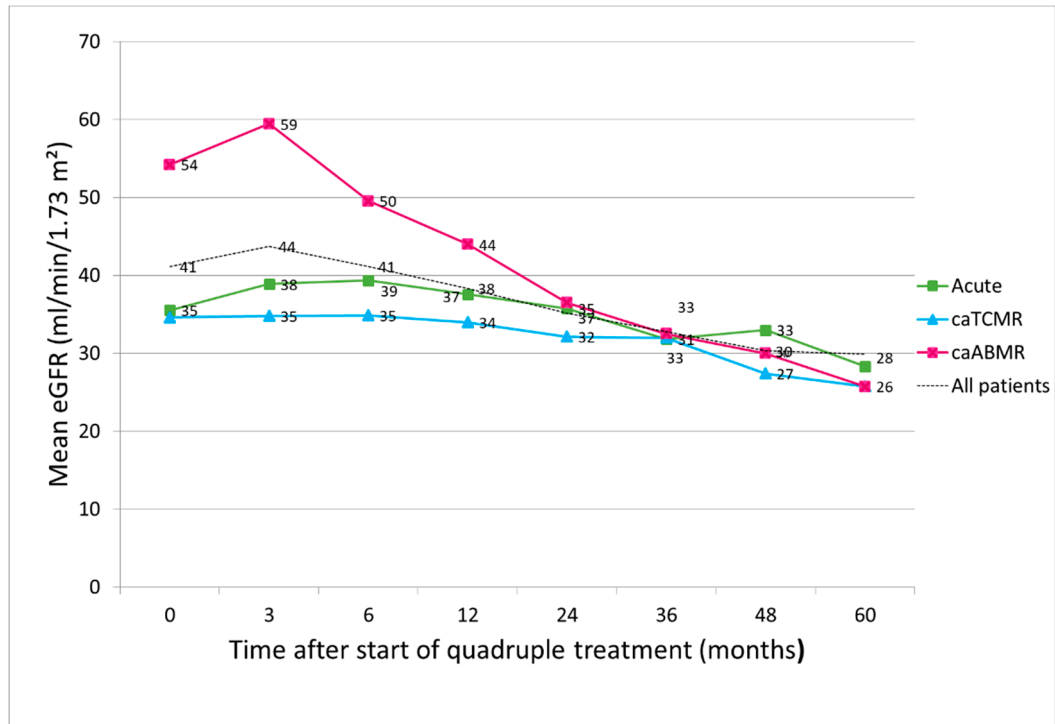

| Month:             | 0  | 3  | 6 | 12 | 24 | 36 | 48 | 60 |
|--------------------|----|----|---|----|----|----|----|----|
| A) Acute group, n: | 9  | 9  | 9 | 9  | 8  | 7  | 6  | 3  |
| B) caTCMR, n:      | 10 | 10 | 9 | 9  | 8  | 6  | 5  | 5  |
| C) caABMR, n:      | 9  | 9  | 9 | 9  | 8  | 7  | 6  | 3  |

**Figure S1.** Mean eGFR at the start of treatment and the first 5 follow-up years in the subgroup of patients with acute rejection (n=9, including 8 with aTCMR and 1 with aABMR), caTCMR (n = 10) and caABMR (n = 9). The dotted line shows the mean eGFR in all patients. After graft loss, eGFR was imputed to 10 ml/min/1.73m<sup>2</sup>.

Abbreviations: caTCMR, chronic active T cell-mediated rejection; caABMR, chronic active antibody-mediated rejection; eGFR, estimated glomerular filtration rate.

**Figure S2: Individual eGFR curves based on rejection subgroups.**

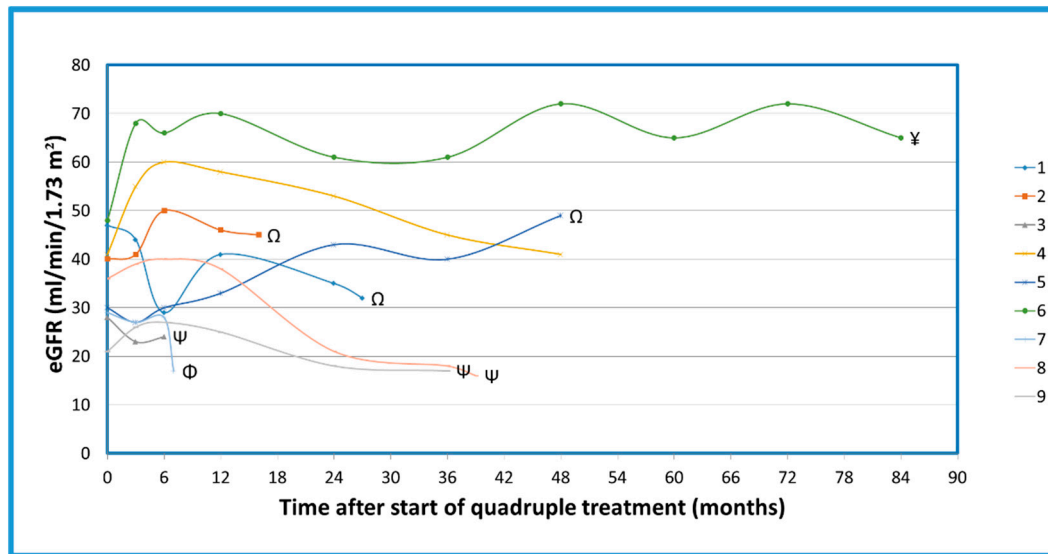

**Figure S2a.** Individual eGFR curves in patients with acute rejection. Patient nr. 2 was included in the aABMR group and the others were included in the aTCMR group.

Abbreviations: aTCMR, acute T cell-mediated rejection; aABMR, active antibody-mediated rejection; eGFR, estimated glomerular filtration rate.

Ω Stopped treatment due to adverse events.

ψ Stopped treatment due to graft loss.

\* Stopped treatment due to death.

Φ The reason for stopping the treatment was not known.

Those with no symbols were still on treatment at the end of follow-up.

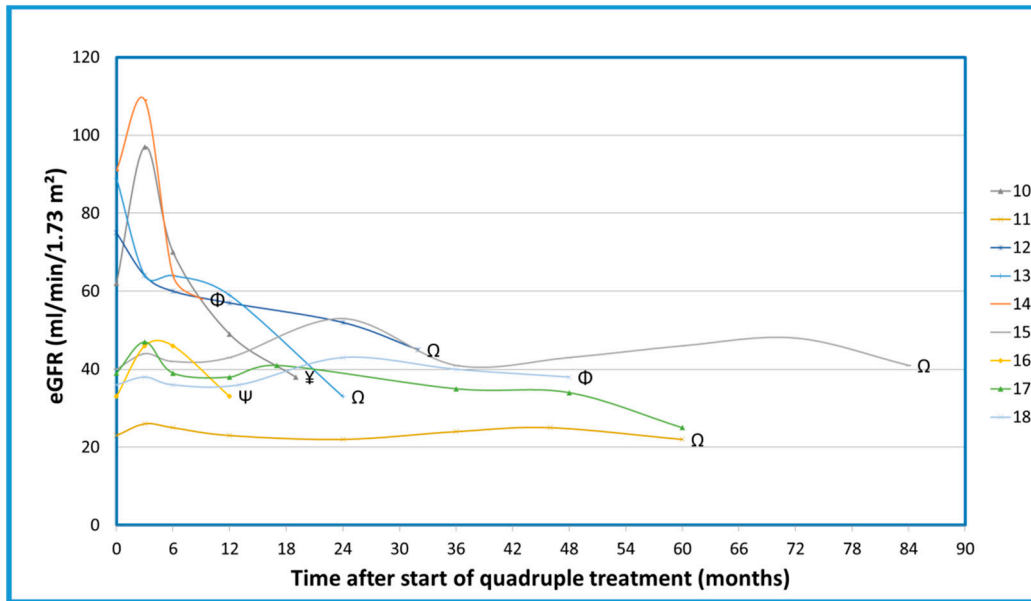

**Figure S2b.** Individual eGFR curves in patients with caABMR

Abbreviations: caABMR, chronic active antibody-mediated rejection; eGFR, estimated glomerular filtration rate.

Ω Stopped treatment due to adverse events.

Ψ Stopped treatment due to graft loss.

† Stopped treatment due to death.

Φ The reason for stopping the treatment was not known.

Those with no symbols were still on treatment at the end of follow-up.

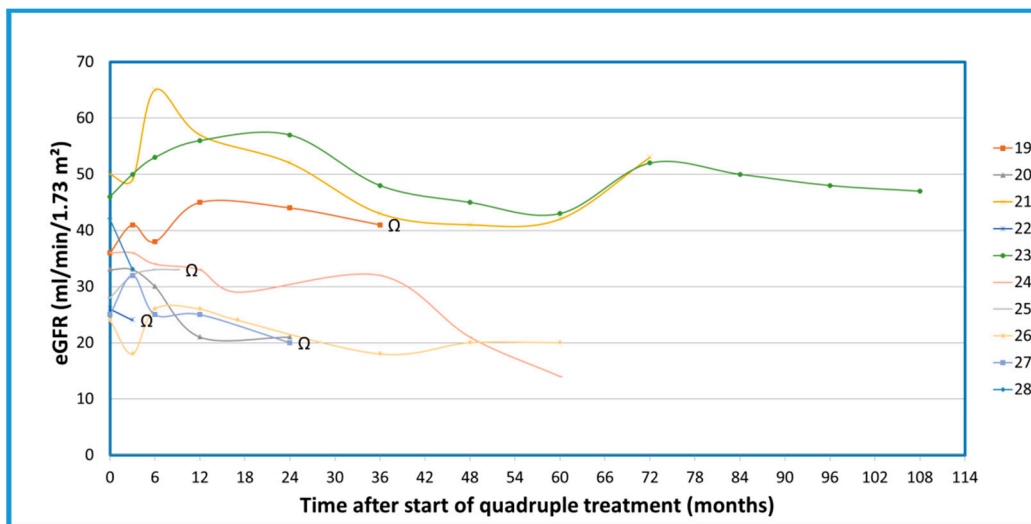

**Figure S2c.** Individual eGFR curves in patients with caTCMR

Abbreviations: caTCMR, chronic active T cell-mediated rejection; eGFR, estimated glomerular filtration rate.

Ω Stopped treatment due to adverse events.

Ψ Stopped treatment due to graft loss.

† Stopped treatment due to death.

Φ The reason for stopping the treatment was not known.

Those with no symbols were still on treatment at the end of follow-up.

**Table S1.** Variables comparing patients who continued versus discontinued treatment

| Variables                                                               | Continued (n=16)     | Discontinued (n=12) | P-value |
|-------------------------------------------------------------------------|----------------------|---------------------|---------|
| Mean age $\pm$ SD, years                                                | 42.6 $\pm$ 17.6      | 49.4 $\pm$ 17.9     | 0.32    |
| Males, n (%)                                                            | 7 (44)               | 6 (50)              | 0.74    |
| HLA sensitization >20%<br>(class 1 or 2), n (%)                         | 3 (19)               | 4 (33)              | 0.38    |
| HLA mismatch grade,<br>median (range)                                   |                      |                     |         |
| class 1                                                                 | 2.5 (0-4)            | 2.5 (0-3)           | 0.42    |
| class 2                                                                 | 1.0 (0-2)            | 1.5 (0-2)           | 0.53    |
| Acute / Chronic rejection, n (%)                                        | 5 / 11 (31 / 69)     | 4 / 8 (33 / 67)     | 0.91    |
| caTCMR / caABMR                                                         | 8 / 3                | 3 / 5               | 0.13    |
| DSA+ at start of treatment, n (%)                                       | 6 (38)               | 7 (58)              | 0.27    |
| C4d+ at start of treatment, n (%)                                       | 4 (25)               | 3 (25)              | 1       |
| Transplant glomerulopathy at start of treatment, n (%)                  | 5 (31)               | 5 (42)              | 0.57    |
| Mean eGFR at start of treatment $\pm$ SD, mL/min/1.73 m <sup>2</sup>    | 39.4 $\pm$ 16.2      | 43.7 $\pm$ 21.1     | 0.55    |
| Mean eGFR at end of treatment $\pm$ SD, mL/min/1.73 m <sup>2</sup>      | 29.4 $\pm$ 18.7      | 34.3 $\pm$ 11.5     | 0.43    |
| Mean cholesterol at start of treatment $\pm$ SD, mmol/L                 | 5.1 $\pm$ 1.7        | 5.7 $\pm$ 2.1       | 0.54    |
| Mean albuminuria at start of treatment $\pm$ SD, g/mol (n=24)           | 26.3 $\pm$ 19.3      | 26.6 $\pm$ 65.3     | 0.99    |
| Mean albuminuria at end of treatment $\pm$ SD, g/mol (n=24)             | 80.2 $\pm$ 89.6      | 70.7 $\pm$ 66.9     | 0.81    |
| Mean duration of treatment $\pm$ SD, months                             | 48.6 $\pm$ 34.3      | 34.3 $\pm$ 24.8     | 0.23    |
| Median tacrolimus trough level at start of treatment (range), $\mu$ g/L | 8.1 (5.5-13)         | 6.8 (4.6-12)        | 0.17    |
| Median tacrolimus trough level at end of treatment (range), $\mu$ g/L   | 4.4 (2.9-8.2)        | 5.3 (2.6-6.7)       | 0.92    |
| Responders vs non-responders, yes/no (%)                                | 6 / 10 (37.5 / 62.5) | 6 / 6 (50 / 50)     | 0.51    |
| Graft survival (functioning graft) , n (%)                              | 13 (81)              | 11 (92)             | 0.44    |
| Mortality, n (%)                                                        | 2 (12.5)             | 3 (25)              | 0.39    |

Abbreviations: caTCMR, chronic active T cell-mediated rejection; caABMR, chronic active antibody-mediated rejection; HLA, human leukocyte antigen; DSA+, donor-specific antibody positive; eGFR, estimated glomerular filtration rate.
